# Supplementary material for: Effects on the magnetic interaction caused by molecular recognition in complexes of 1,2-azole-based oxamate and [Cu(bpca)]+ units
Source: Royal Society of Chemistry journal article supplement (doi:10.1039/d3ce01180a), 2024-01-01
Supplement: d3ce01180a1.pdf [file d3ce01180a1.pdf]

## Electronic Supporting Information

### Effects on the magnetic interaction caused by molecular recognition in complexes of 1,2-azole-based oxamate and [Cu(bpca)]<sup>+</sup> units

Willian X. C. Oliveira,<sup>\*a</sup> Carlos B. Pinheiro,<sup>b</sup> Yves Journaux,<sup>c</sup> Miguel Julve,<sup>d</sup> Cynthia L. M. Pereira<sup>\*a</sup>

a. Departamento de Química, Instituto de Ciências Exatas, Universidade Federal de Minas Gerais. Av. Pres. Antônio Carlos, 6627, Pampulha, 31270-901 Belo Horizonte, Minas Gerais, Brazil;

b. Departamento de Física, Instituto de Ciências Exatas, Universidade Federal de Minas Gerais. Av. Pres. Antônio Carlos, 6627, Pampulha, 31270-901 Belo Horizonte, Minas Gerais, Brazil;

c. Sorbonne Universités UPMC Univ Paris 06, CNRS UMR 8232, Institut Parisien de Chimie Moléculaire, Paris, France.

d. Instituto de Ciencia Molecular, Universitat de València, C/ Catedrático José Beltrán 2, 46980 Paterna, Valencia, Spain.

\* Corresponding authors: wxcoliveira@ufmg.br; cynthialopes@ufmg.br

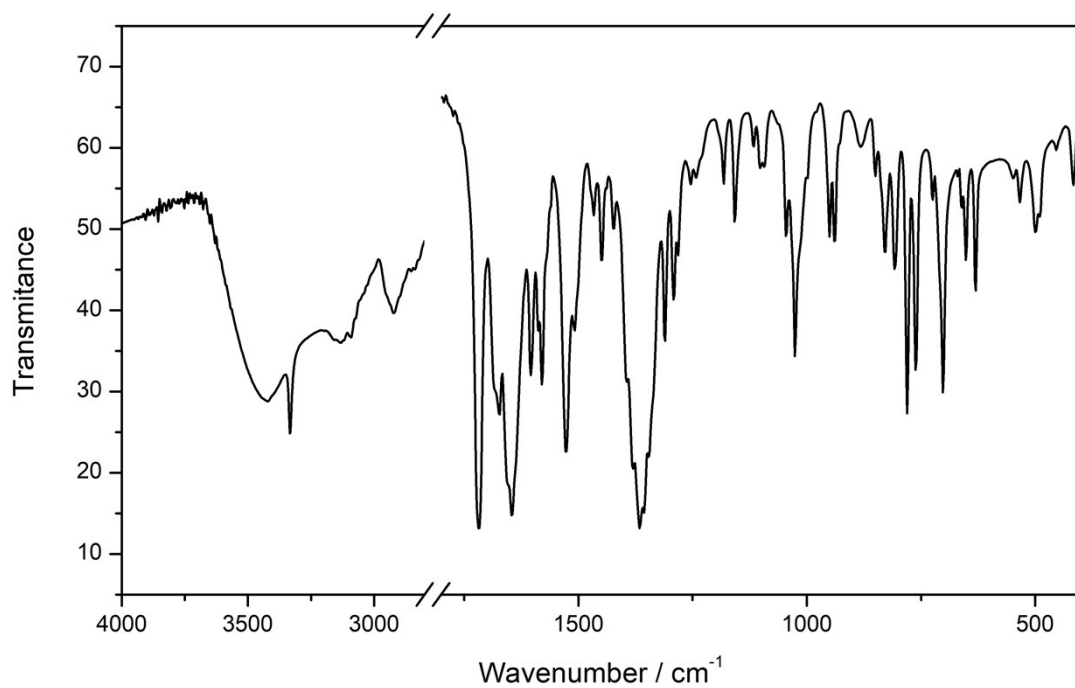

**Figure S1.** Infrared spectrum for **1** as a KBr disk.

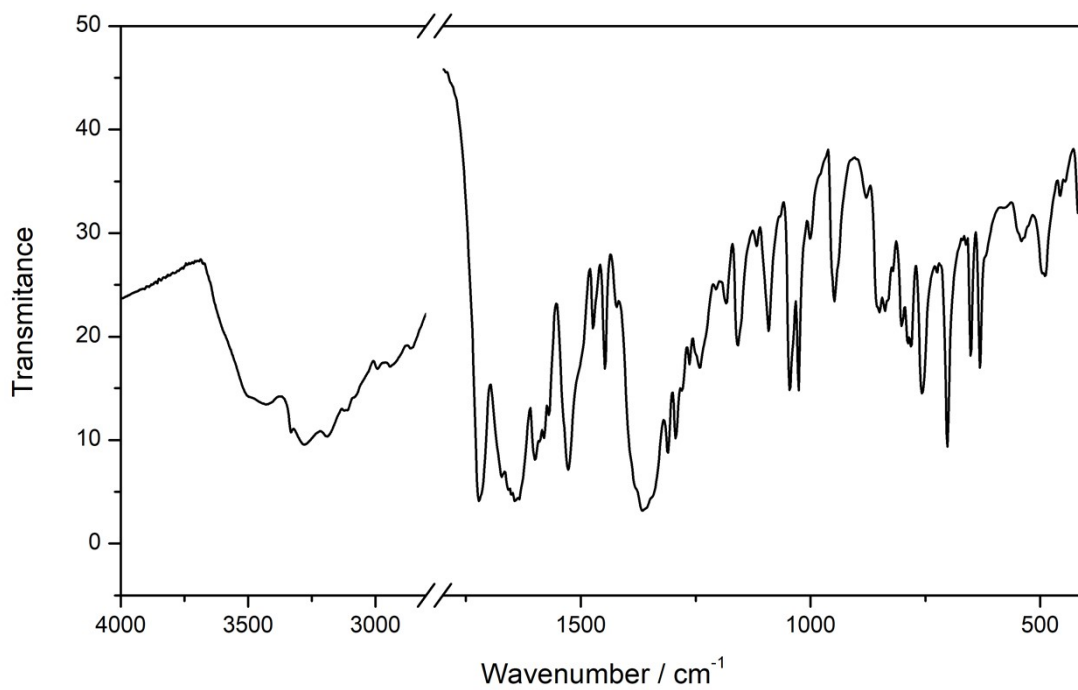

**Figure S2.** Infrared spectrum for **3** as a KBr disk.

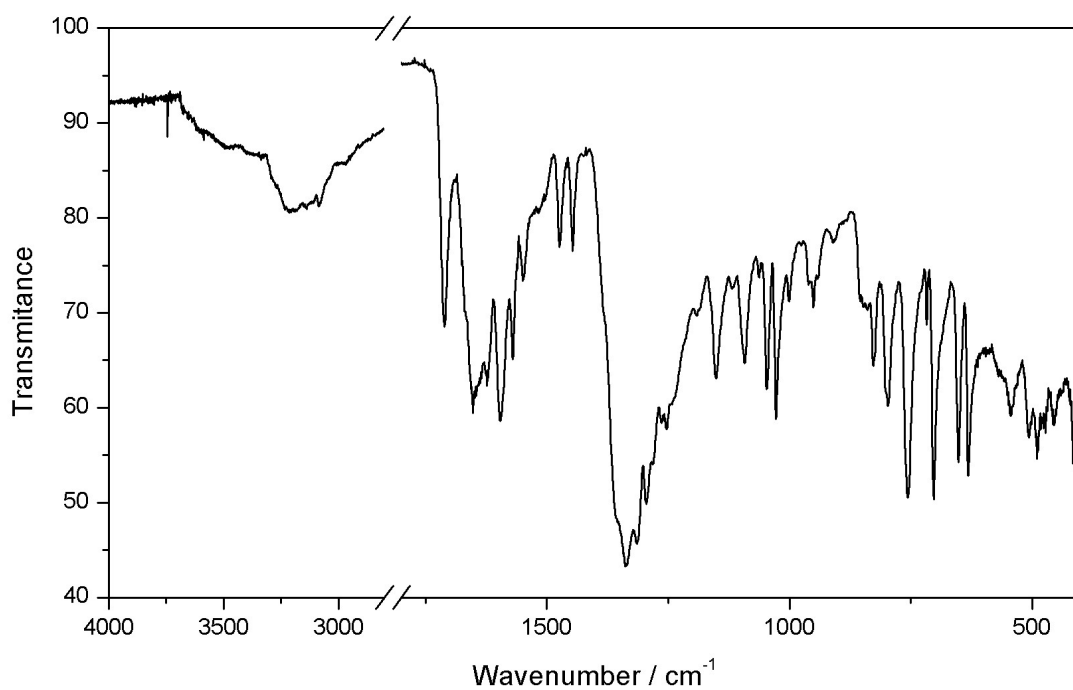

**Figure S3.** Infrared spectrum for **4** recorded on an ATR equipment.

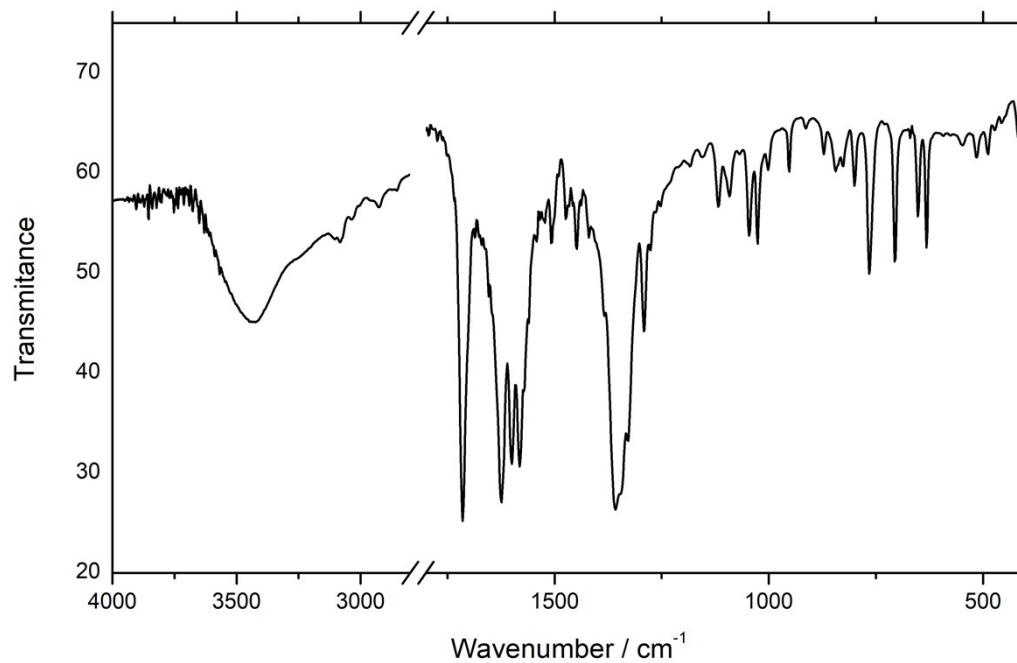

**Figure S4.** Infrared spectrum of **5** as a KBr disk.

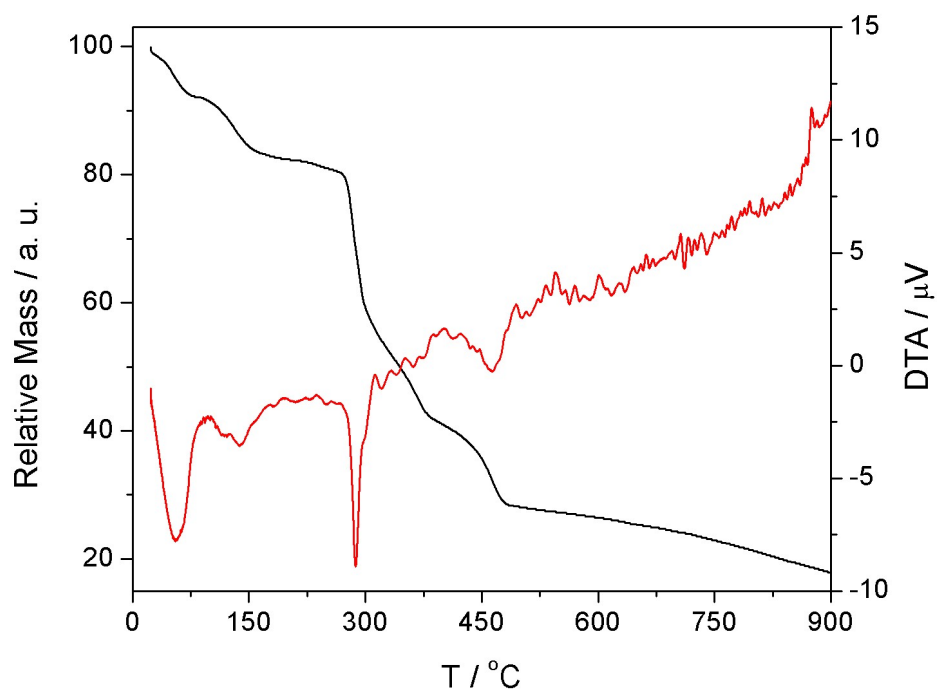

**Figure S5.** Thermal analysis for **1** under N<sub>2</sub> flow. The black line refers to the mass loss, whereas the red one is the DTA curve.

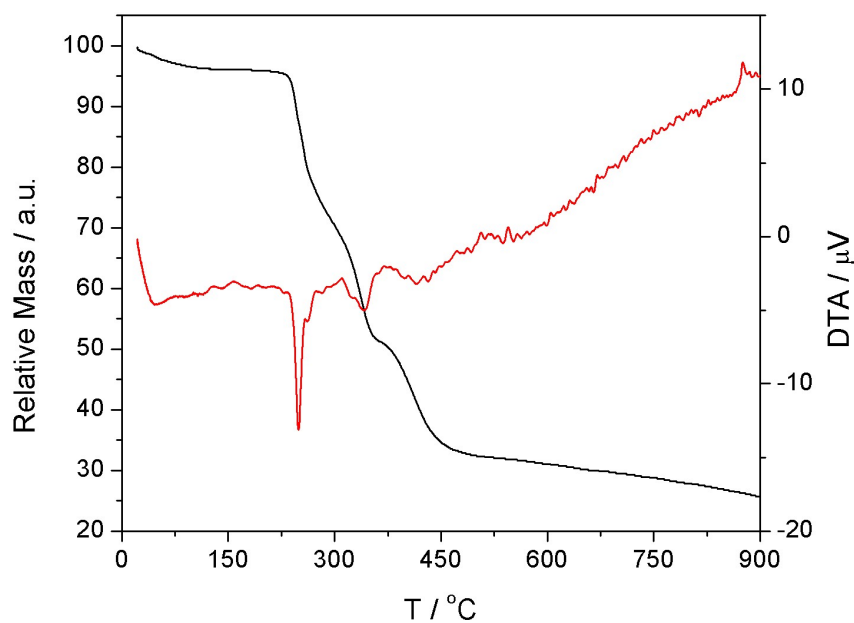

**Figure S6.** Thermal analysis for **3** under N<sub>2</sub> flow. The black line refers to the mass loss, whereas the red one is the DTA curve.

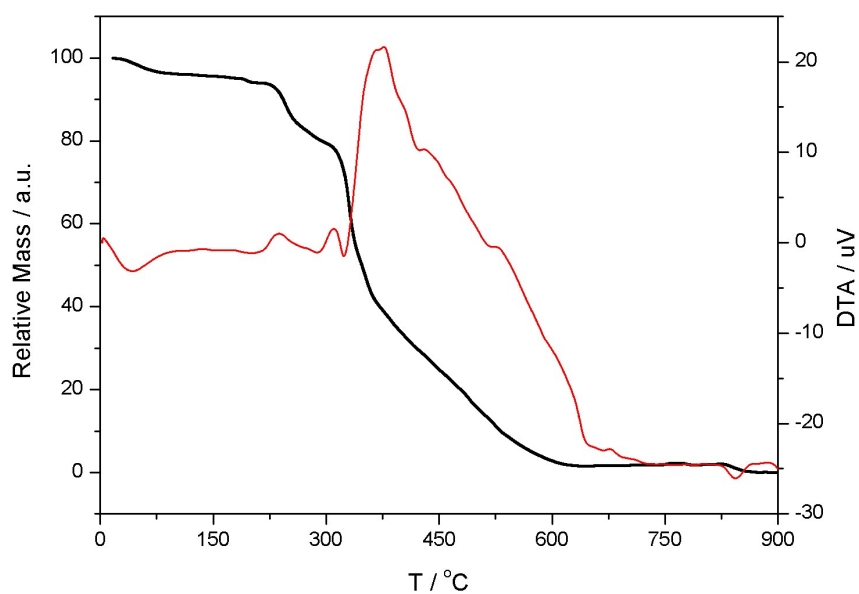

**Figure S7.** Thermal analysis for **4** under N<sub>2</sub> flow. The black line refers to the mass loss whereas the red one is the DTA curve.

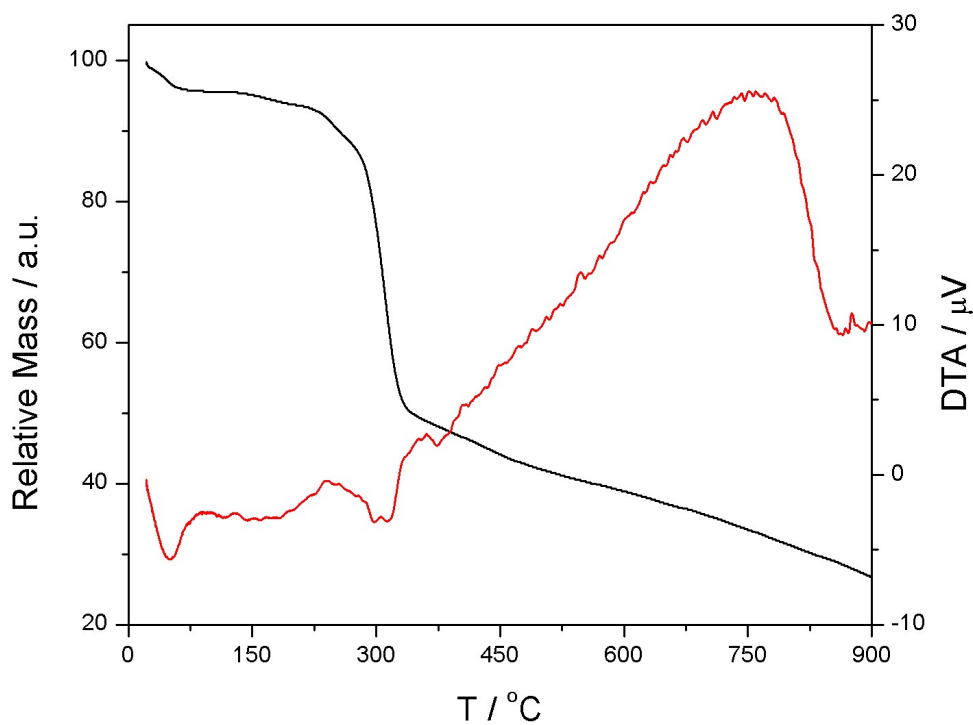

**Figure S8.** Thermal analysis for **5** under N<sub>2</sub> flow. The black line refers to the mass loss, whereas the red one is the DTA curve.

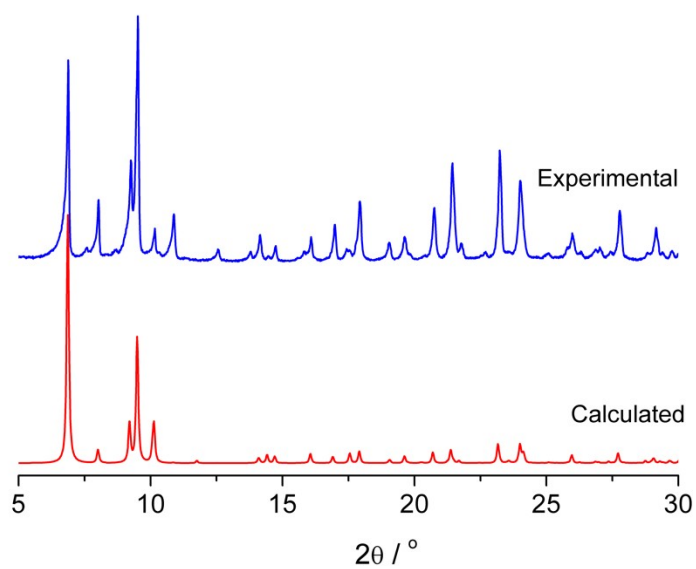

**Figure S9.** X-ray powder diffraction for **1** and comparison with the calculated pattern from its single crystal structure.

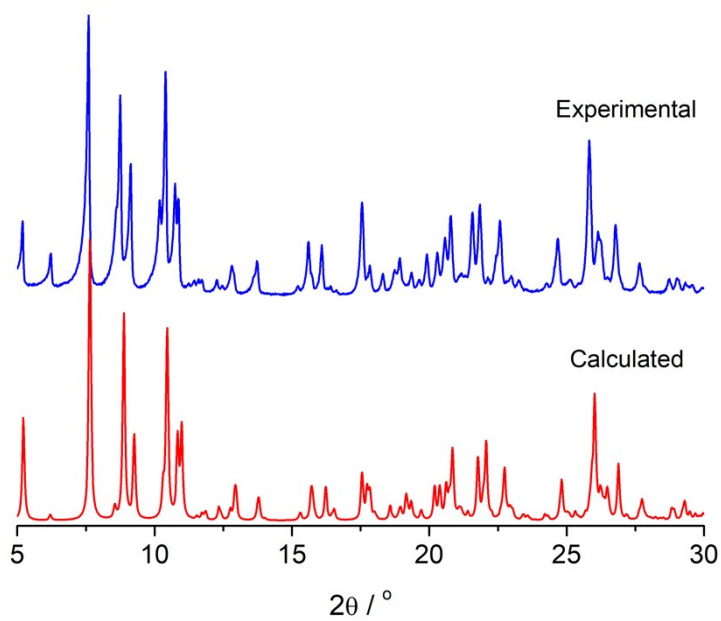

**Figure S10.** X-ray powder diffraction for **3** and comparison with the calculated pattern from its single crystal structure.

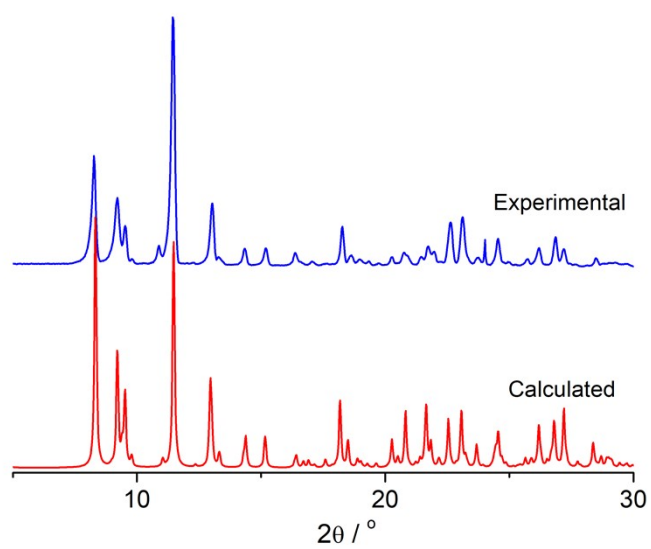

**Figure S11.** X-ray powder diffraction for **4** and comparison with the calculated pattern from its single crystal structure.

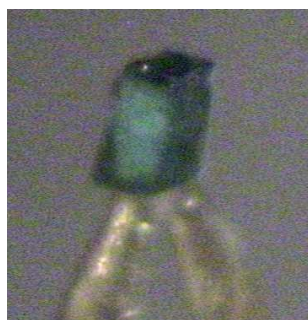

(a)

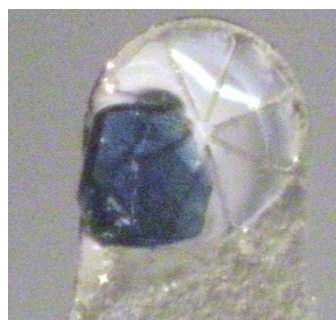

(b)

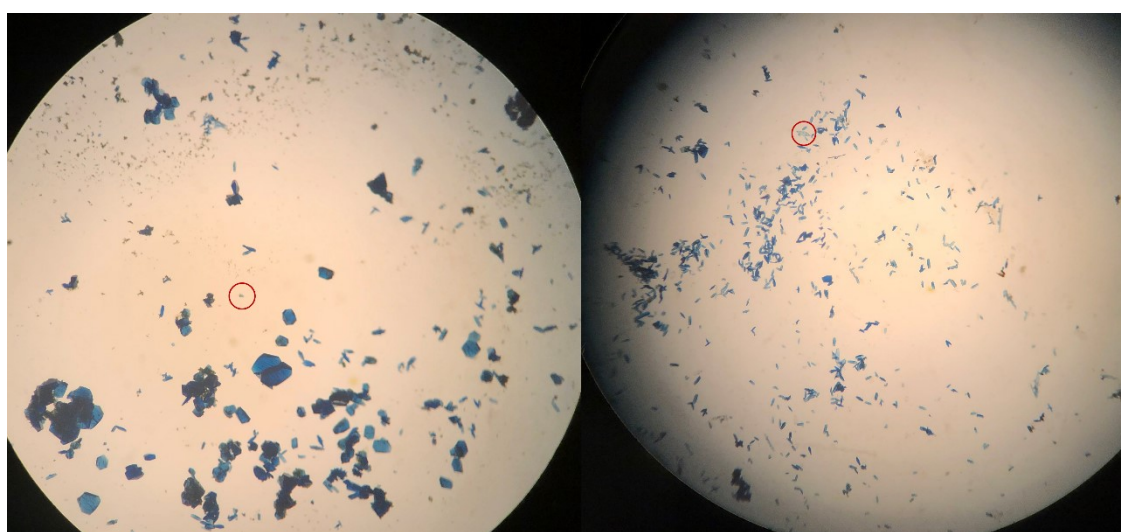

(c)

**Figure S12** – (a) Single crystal of **1** and (b) single crystal of **4**. (c) Single crystals of **4** and **2** together without separation from their synthesis, showcasing the low yield of **2** (red circles).



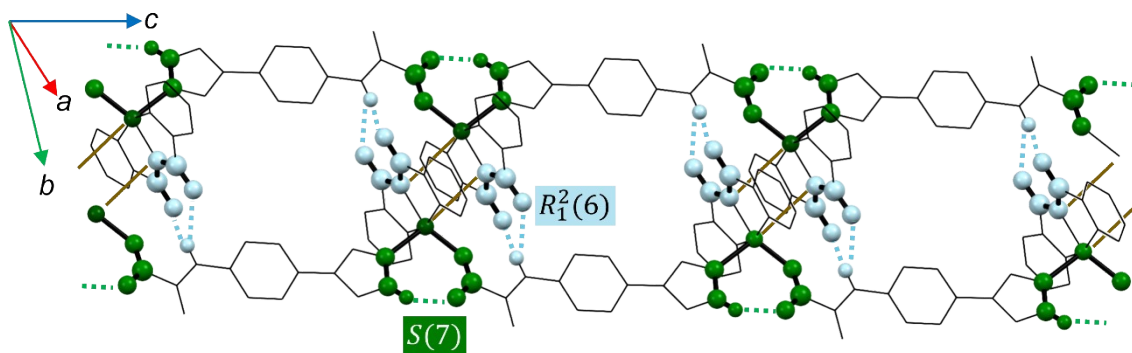

**Figure S13.** Crystal packing of **1** focusing on the double strain interchain hydrogen bonds.

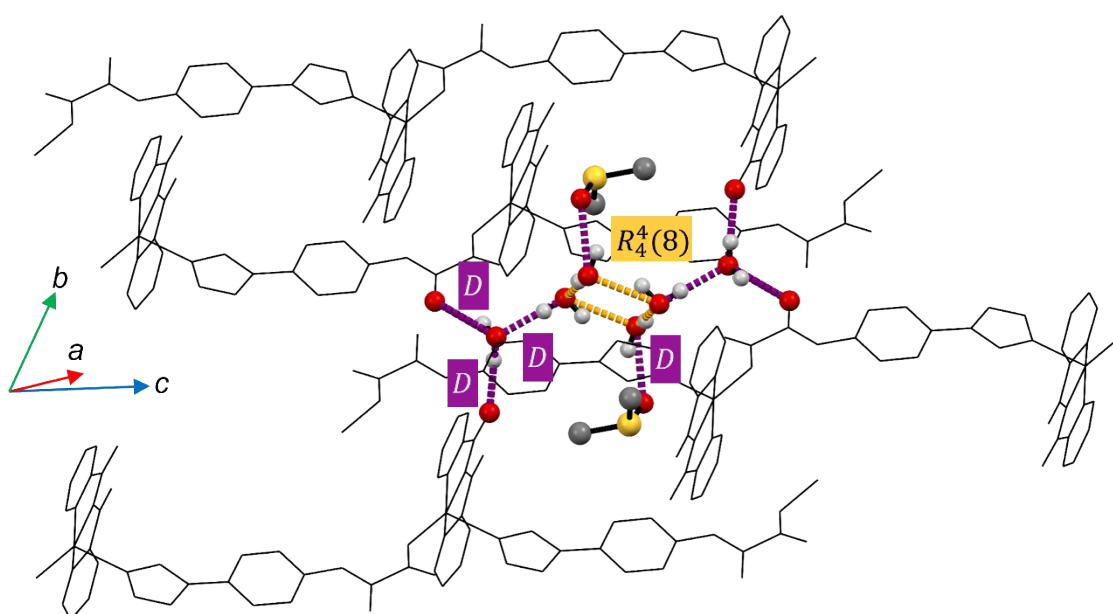

**Figure S14.** Crystal packing of **2** focusing on the hydrogen bond net between the coordination polymers and the crystallization solvent molecules.

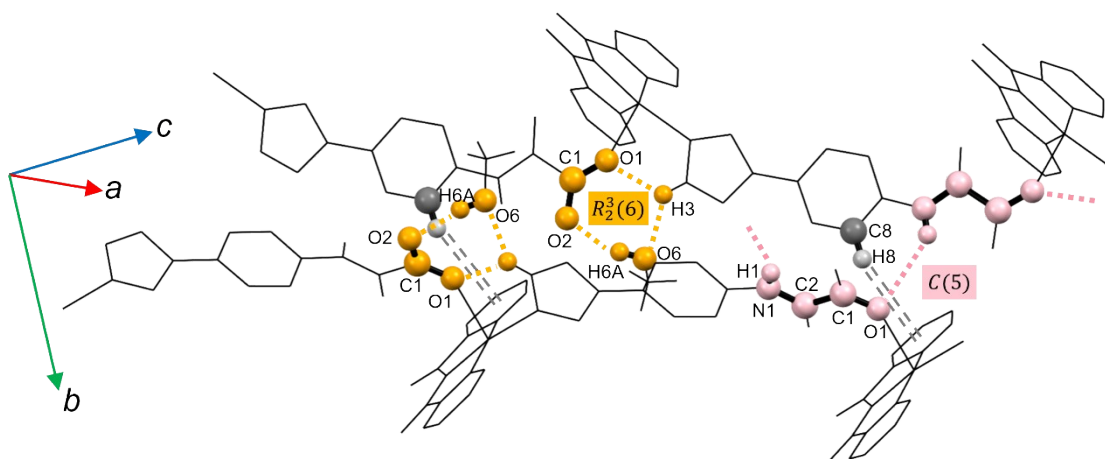

**Figure S15.** Crystal packing of **2** focusing on the different interchain hydrogen bonds and C–H⋯ $\pi$  interactions.

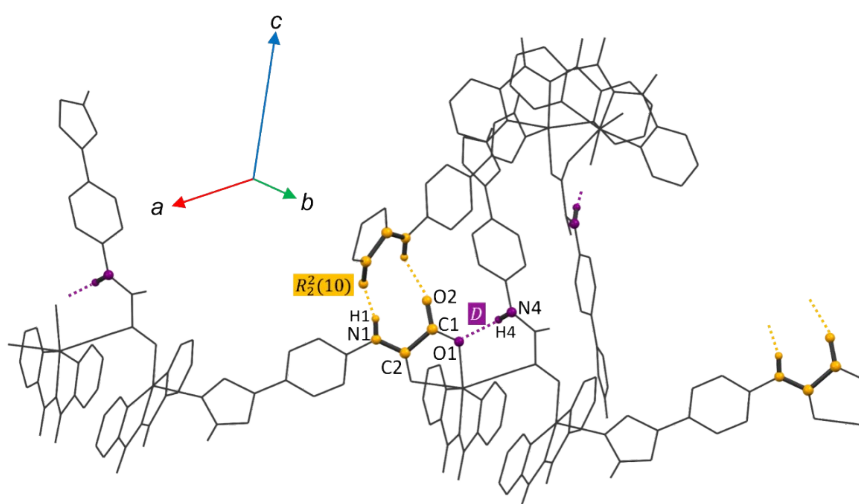

**Figure S16.** Crystal packing of **3** focusing on the interchain hydrogen bonds.

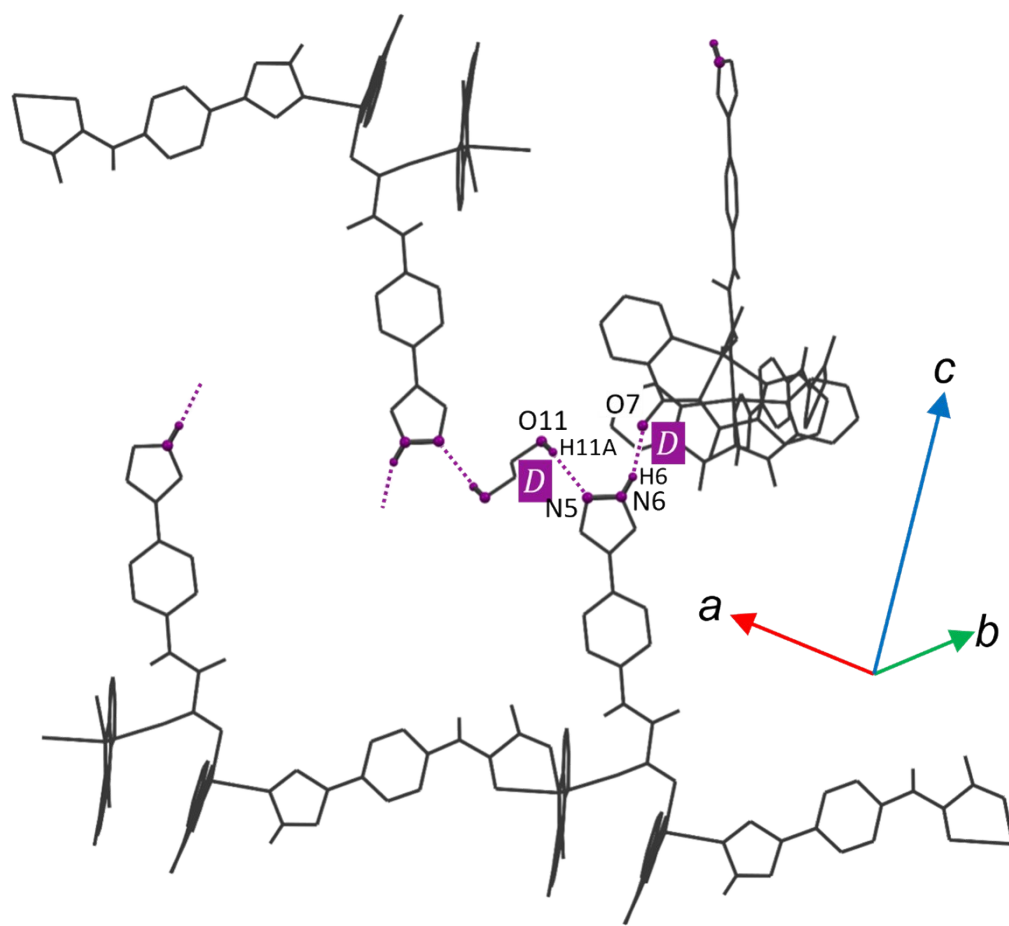

**Figure S17.** Crystal packing of **3** focusing on the interactions involving the coordination polymers and the solvent molecules.

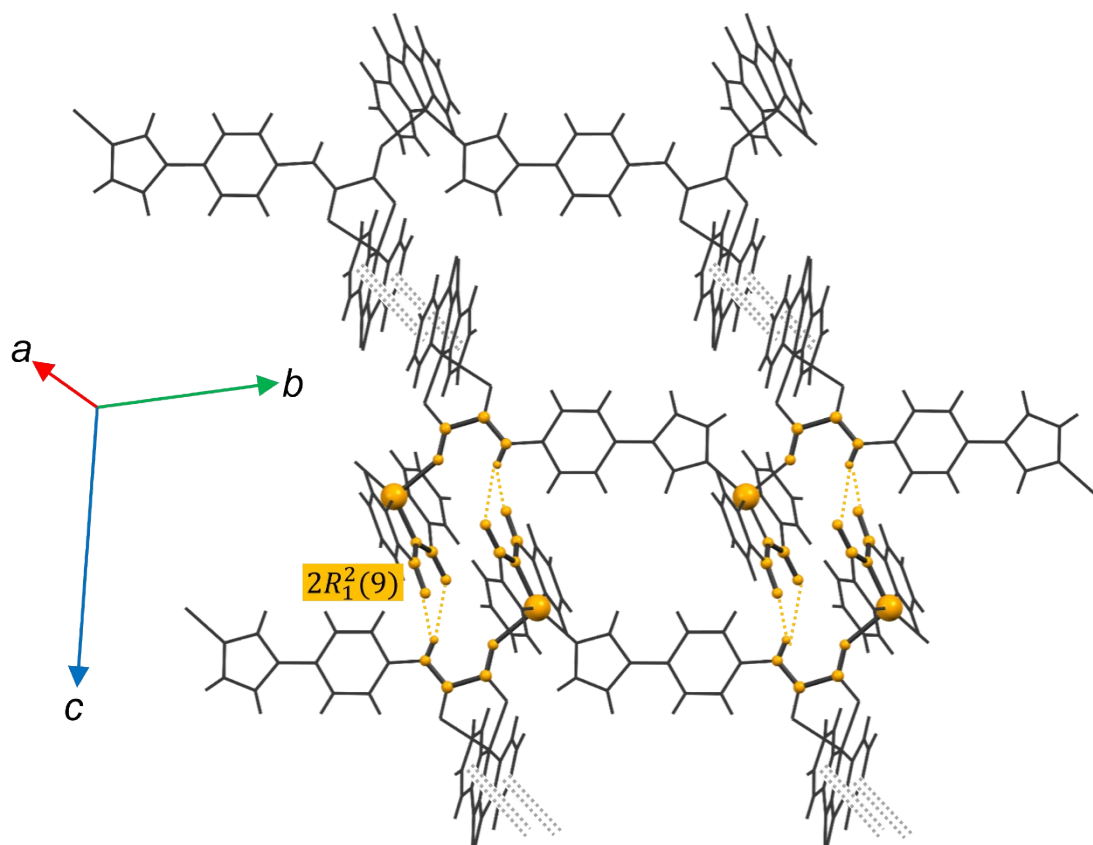

**Figure S18.** Crystal packing of **4** featuring the interchain hydrogen bonds and  $\pi$ - $\pi$  stacking.

**Table S1.** Main bond lengths and angles for **1** and **2**.

| <b>1</b>                               |           |                       |             | <b>2</b>                               |           |                       |             |
|----------------------------------------|-----------|-----------------------|-------------|----------------------------------------|-----------|-----------------------|-------------|
| Bond length Cu–L/Å                     |           | Bond angle L–Cu1–L'/° |             | Bond length Cu–L/Å                     |           | Bond angle L–Cu1–L'/° |             |
| Cu1–N2                                 | 2.207 (3) | N2–Cu1–N4             | 94.09 (13)  | Cu1–N2                                 | 1.987 (2) | N2–Cu1–N4             | 96.42 (10)  |
| Cu1–N4                                 | 2.024 (3) | N2–Cu1–N25            | 98.16 (13)  | Cu1–N4                                 | 2.018 (2) | N2–Cu1–N5             | 170.79 (10) |
| Cu1–N5                                 | 1.956 (3) | N2–Cu1–N6             | 95.31 (13)  | Cu1–N5                                 | 1.935 (2) | N2–Cu1–N6             | 99.15 (10)  |
| Cu1–N6                                 | 2.036 (3) | N2–Cu1–O1             | 106.06 (12) | Cu1–N6                                 | 1.997 (2) | N2–Cu1–O1             | 85.45 (9)   |
| Cu1–O1                                 | 1.944 (3) | N4–Cu1–N5             | 81.20 (13)  | Cu1–O1                                 | 2.267 (2) | N4–Cu1–N5             | 81.63 (10)  |
| Shortest Cu···Cu distance / Å          |           | N4–Cu1–N6             | 160.91 (13) | Shortest Cu···Cu distance / Å          |           | N4–Cu1–N6             | 162.90 (10) |
| Cu1···Cu1 <sup>vi</sup>                | 4.366(1)  | N4–Cu1–O1             | 94.27 (12)  | Cu1···Cu1 <sup>iii</sup>               | 5.1663(8) | N4–Cu1–O1             | 98.55 (10)  |
| Shortest intrachain Cu···Cu distance/Å |           | N5–Cu1–N6             | 81.05 (13)  | Shortest intrachain Cu···Cu distance/Å |           | N5–Cu1–N6             | 81.87 (10)  |
| Cu1···Cu1 <sup>i</sup>                 | 13.672(5) | N5–Cu1–O1             | 155.64 (12) | Cu1···Cu1 <sup>i</sup>                 | 13.884(1) | N5–Cu1–O1             | 103.73 (9)  |
|                                        |           | N6–Cu1–O1             | 99.02 (13)  |                                        |           | N6–Cu1–O1             | 89.72 (10)  |

Symmetry codes. **1:** (i) =  $x, y, 1+z$ ; (vi) =  $2-x, 2-y, -z$ . **2:** (i) =  $-1+x, y, -1+z$ ; (iii) =  $1-x, -y, -z$ .

**Table S2.** Main bond lengths and angles for **3** and **4**.

| <b>3</b>                    |           |                       |             | <b>4</b>                    |           |                       |             |
|-----------------------------|-----------|-----------------------|-------------|-----------------------------|-----------|-----------------------|-------------|
| Bond length Cu–L/Å          |           | Bond angle L–Cu1–L’/° |             | Bond length Cu–L/Å          |           | Bond angle L–Cu1–L’/° |             |
| Cu1–N7                      | 2.020 (4) | N7–Cu1–N8             | 82.03 (17)  | Cu1–N4                      | 2.013 (4) | N4–Cu1–N5             | 81.51 (15)  |
| Cu1–N8                      | 1.939 (4) | N7–Cu1–N9             | 163.68 (17) | Cu1–N5                      | 1.934 (3) | N4–Cu1–N6             | 162.31 (14) |
| Cu1–N9                      | 2.002 (4) | N7–Cu1–O1             | 95.28 (14)  | Cu1–N6                      | 2.017 (4) | N4–Cu1–O1             | 98.07 (14)  |
| Cu1–O1                      | 1.973 (3) | N7–Cu1–O3             | 93.86 (13)  | Cu1–O1                      | 1.983 (3) | N4–Cu1–O3             | 94.56 (13)  |
| Cu1–O3                      | 2.399 (3) | N7–Cu1–O4             | 92.31 (15)  | Cu1–O3                      | 2.277 (2) | N5–Cu1–N6             | 81.93 (14)  |
| Cu1–O4                      | 2.370 (3) | N8–Cu1–N9             | 82.20 (18)  | Cu2–N7                      | 2.001 (3) | N5–Cu1–O1             | 171.09 (12) |
| Cu2–N2                      | 2.241 (3) | N8–Cu1–O1             | 170.97 (14) | Cu2–N8                      | 1.943 (3) | N5–Cu1–O3             | 111.37 (12) |
| Cu2–N10                     | 2.017 (4) | N8–Cu1–O3             | 94.98 (13)  | Cu2–N9                      | 2.009 (3) | N6–Cu1–O1             | 97.32 (13)  |
| Cu2–N11                     | 1.943 (3) | N8–Cu1–O4             | 110.01 (14) | Cu2–O2                      | 2.272 (2) | N6–Cu1–O3             | 97.24 (13)  |
| Cu2–N12                     | 2.024 (4) | N9–Cu1–O1             | 100.94 (16) |                             |           | O1–Cu1–O3             | 77.54 (9)   |
| Cu2–O5                      | 1.963 (3) | N9–Cu1–O3             | 91.67 (13)  |                             |           | N2–Cu2–N8             | 97.80 (14)  |
| Shortest Cu···Cu distance/Å |           | N9–Cu1–O4             | 89.15 (15)  | Shortest Cu···Cu distance/Å |           | N2–Cu2–N8             | 156.41 (13) |
| Cu1···Cu2                   | 4.624(1)  | O1–Cu1–O3             | 76.54 (11)  | Cu1···Cu1 <sup>vii</sup>    | 4.8757(7) | N2–Cu2–N9             | 97.72 (14)  |
| Intrachain<br>distance/Å    | Cu···Cu   | O1–Cu1–O4             | 78.64 (12)  | Intrachain<br>distance/Å    | Cu···Cu   | N2–Cu2–O2             | 99.04 (11)  |
| Cu1···Cu1 <sup>v</sup>      | 17.450(1) | O3–Cu1–O4             | 154.86 (11) | Cu1···Cu2                   | 5.7391(7) | N7–Cu2–N8             | 81.73 (13)  |
| Cu1···Cu2 <sup>v</sup>      | 13.375(1) | N2–Cu2–N10            | 97.92 (14)  | Cu1···Cu1 <sup>i</sup>      | 13.719(2) | N7–Cu2–N9             | 163.29 (13) |
| Cu2···Cu2 <sup>v</sup>      | 17.450(1) | N2–Cu2–N11            | 103.09 (14) | Cu2···Cu2 <sup>i</sup>      | 13.719(2) | N7–Cu2–O2             | 92.38 (12)  |
|                             |           | N2–Cu2–N12            | 95.64 (14)  | Cu1···Cu2 <sup>i</sup>      | 13.030(2) | N8–Cu2–O2             | 104.55 (11) |

|             |             |                        |           |           |            |
|-------------|-------------|------------------------|-----------|-----------|------------|
| N2–Cu2–O5   | 88.46 (13)  | Cu2···Cu1 <sup>i</sup> | 16.508(2) | N8–Cu2–N9 | 81.58 (13) |
| N10–Cu2–N11 | 81.64 (15)  |                        |           | N9–Cu2–O2 | 91.26 (12) |
| N10–Cu2–N12 | 160.42 (15) |                        |           |           |            |
| N10–Cu2–O5  | 96.06 (18)  |                        |           |           |            |
| N11–Cu2–N12 | 81.57 (15)  |                        |           |           |            |
| N11–Cu2–O5  | 168.41 (14) |                        |           |           |            |
| N12–Cu2–O5  | 98.36 (17)  |                        |           |           |            |

Symmetry code: (v) =  $-1+x, 1+y, z$  (**3**); (i) =  $-1+x, 1+y, z$  and (vii) =  $2-x, 1-y, 1-z$  (**4**).

**Table S3.** Main bond lengths and angles for **5**

| <b>5</b>                              |           |                      |             |
|---------------------------------------|-----------|----------------------|-------------|
| Bond length Cu–L/Å                    |           | Bond angle L–Cu–L'/° |             |
| Cu1–N6                                | 2.015 (3) | N7–Cu1–N6            | 82.65 (13)  |
| Cu1–N7                                | 1.928 (3) | N6–Cu1–N8            | 164.54 (14) |
| Cu1–N8                                | 2.003 (3) | N6–Cu1–O2            | 95.54 (12)  |
| Cu1–O2                                | 1.959 (3) | N6–Cu1–O3            | 93.01 (12)  |
| Cu1–O3                                | 2.238 (3) | N7–Cu1–N8            | 82.84 (13)  |
| Cu2–N1                                | 1.971 (3) | N7–Cu1–O2            | 169.54 (14) |
| Cu2–N3                                | 2.020 (3) | N7–Cu1–O3            | 111.40 (12) |
| Cu2–N4                                | 1.929 (3) | N8–Cu1–O2            | 97.78 (12)  |
| Cu2–N5                                | 2.011 (4) | N8–Cu1–O3            | 97.20 (12)  |
| Cu2–O1                                | 2.225 (3) | O2–Cu1–O3            | 78.94 (10)  |
| Intramolecular<br>distance/Å          | Cu---Cu   | N1–Cu2–N3            | 98.77 (13)  |
| Cu1...Cu2                             | 5.456(9)  | N1–Cu2–N4            | 170.19 (15) |
| Shortest intramolecular<br>distance/Å | Cu---Cu   | N1–Cu2–N5            | 95.43 (13)  |
| Cu2...Cu1 <sup>i</sup>                | 3.7987(9) | N1–Cu2–O1            | 80.39 (12)  |
|                                       |           | N3–Cu2–N4            | 82.50 (14)  |
|                                       |           | N3–Cu2–N5            | 164.88 (14) |
|                                       |           | N3–Cu2–O1            | 92.80 (13)  |
|                                       |           | N4–Cu2–N5            | 82.63 (14)  |
|                                       |           | N4–Cu2–O1            | 109.31 (13) |
|                                       |           | N5–Cu2–O1            | 94.69 (13)  |

Symmetry code: (i) = 1–x, 2–y, 1–z.



**Table S4.** Hydrogen bonds for **1**.

| $D-H\cdots A$                    | $D-H/\text{\AA}$ | $H\cdots A/\text{\AA}$ | $D\cdots A/\text{\AA}$ | $D-H\cdots A/^\circ$ |
|----------------------------------|------------------|------------------------|------------------------|----------------------|
| N3-H3 $\cdots$ O2                | 0.86             | 2.04                   | 2.785 (4)              | 144                  |
| N3-H3 $\cdots$ O7                | 0.86             | 2.56                   | 3.162 (6)              | 128                  |
| N1-H1 $\cdots$ O5 <sup>iii</sup> | 0.86             | 2.30                   | 3.068 (4)              | 149                  |
| O7-H7A $\cdots$ O6               | 0.90 (1)         | 1.97 (1)               | 2.865 (5)              | 177 (4)              |
| O7-H7B $\cdots$ O8 <sup>iv</sup> | 0.90 (1)         | 2.03 (3)               | 2.799 (6)              | 143 (5)              |
| O6-H6A $\cdots$ O5 <sup>v</sup>  | 0.90 (1)         | 1.92 (1)               | 2.807 (4)              | 168 (4)              |
| O6-H6B $\cdots$ O3               | 0.90 (1)         | 2.06 (3)               | 2.882 (4)              | 152 (5)              |
| O8-H8A $\cdots$ O9A <sup>a</sup> | 0.90 (1)         | 2.03 (5)               | 2.797 (9)              | 143 (6)              |
| O8-H8A $\cdots$ O9B <sup>b</sup> | 0.90 (1)         | 2.49 (2)               | 3.389 (17)             | 175 (7)              |
| O8-H8B $\cdots$ O7 <sup>vi</sup> | 0.90 (1)         | 1.93 (2)               | 2.824 (7)              | 170 (7)              |

Symmetry code: (iii)  $-x+2, -y+2, -z$ ; (iv)  $x-1, y, z$ ; (v)  $x, y-1, z$ ; (vi)  $-x+2, -y+1, -z+1$ .

**Table S5.** Hydrogen bonds for **2**.

| $D-H\cdots A$      | $D-H/\text{\AA}$ | $H\cdots A/\text{\AA}$ | $D\cdots A/\text{\AA}$ | $D-H\cdots A/^\circ$ |
|--------------------|------------------|------------------------|------------------------|----------------------|
| N3-H3 $\cdots$ O6  | 0.86             | 2.20                   | 2.883 (4)              | 136                  |
| N3-H3 $\cdots$ O1  | 0.86             | 2.16                   | 2.729 (3)              | 124                  |
| O7-H7B $\cdots$ O5 | 0.82             | 2.12                   | 2.839 (4)              | 147                  |
| O6-H6A $\cdots$ O2 | 0.82             | 1.96                   | 2.749 (4)              | 161                  |

**Table S6.** Hydrogen bonds for **3**.

| $D-H\cdots A$                    | $D-H/\text{\AA}$ | $H\cdots A/\text{\AA}$ | $D\cdots A/\text{\AA}$ | $D-H\cdots A/^\circ$ |
|----------------------------------|------------------|------------------------|------------------------|----------------------|
| N6-H6A $\cdots$ O7 <sup>iv</sup> | 0.88             | 1.97                   | 2.796 (5)              | 156                  |
| N3-H6 $\cdots$ O9 <sup>v</sup>   | 0.88             | 2.27                   | 2.865 (5)              | 125                  |
| N3-H6 $\cdots$ O10 <sup>v</sup>  | 0.88             | 2.00                   | 2.800 (5)              | 150                  |
| N4-H10 $\cdots$ O1               | 0.88             | 2.34                   | 3.213 (5)              | 172                  |

Symmetry code: (iv)  $x, -y+2, z+1/2$ ; (v)  $-x, -y+2, -z$ .

**Table S7.** Hydrogen bond for **4**.

| $D-H\cdots A$                      | $D-H/\text{\AA}$ | $H\cdots A/\text{\AA}$ | $D\cdots A/\text{\AA}$ | $D-H\cdots A/^\circ$ |
|------------------------------------|------------------|------------------------|------------------------|----------------------|
| N3-H3 $\cdots$ O1 <sup>i</sup>     | 0.86             | 2.04                   | 2.851 (4)              | 156                  |
| N1-H1 $\cdots$ O5 <sup>v</sup>     | 0.86             | 2.53                   | 3.311 (4)              | 152                  |
| N1-H1 $\cdots$ O4 <sup>v</sup>     | 0.86             | 2.51                   | 3.127 (4)              | 130                  |
| O12-H12A $\cdots$ O6 <sup>vi</sup> | 0.82             | 1.97                   | 2.778 (6)              | 168                  |
| O10-H10 $\cdots$ O4 <sup>v</sup>   | 0.82             | 2.06                   | 2.874 (6)              | 174                  |

Symmetry code: (i)  $x-1, y+1, z$ ; (v)  $-x+1, -y+1, -z+2$ ; (vi)  $-x+2, -y+1, -z+1$ .

**Table S8.** SHAPE calculations for metal atoms

| Compound | Atom | Coordination | Deviation from Shapes <sup>a</sup> |        |        |        |
|----------|------|--------------|------------------------------------|--------|--------|--------|
|          |      | Number       | TBPY-5                             | SPY-5  | OC-6   | TPR-6  |
| <b>1</b> | Cu1  | 5            | 8.212                              | 7.917  |        |        |
| <b>2</b> | Cu1  | 5            | 12.715                             | 8.942  |        |        |
| <b>3</b> | Cu1  | 5            |                                    |        | 47.871 | 49.086 |
|          | Cu2  | 6            | 19.773                             | 18.618 |        |        |
| <b>4</b> | Cu1  | 5            | 11.338                             | 8.056  |        |        |
|          | Cu2  | 5            | 8.535                              | 7.432  |        |        |
| <b>5</b> | Cu1  | 5            | 13.664                             | 8.581  |        |        |
|          | Cu2  | 5            | 13.940                             | 8.968  |        |        |

<sup>a</sup>Code associations: TBPY-5 = Trigonal bipyramid ( $D_{3h}$ ), SPY-5 = Spherical square pyramid ( $C_{4v}$ ), OC-6 = Octahedron ( $O_h$ ) and TPR-6 = Trigonal prism ( $D_{3h}$ ).
